# Supplementary material for: Restrictive blood transfusion strategies and associated infection in orthopedic patients: a meta-analysis of 8 randomized controlled trials
Source: PubMed Central journal article supplement (PMC4549631; doi:10.1038/srep13421), 2015-08-26
Supplement: srep13421-s1.pdf [file srep13421-s1.pdf]

# Supplementary Information

## **Restrictive blood transfusion strategies and associated infection in orthopedic patients: a meta-analysis of 8 randomized controlled trials**

Zhao-wei Teng<sup>1\*¶</sup>, Yun Zhu<sup>2¶</sup>, Yu-gang Liu<sup>3</sup>, Guo-jun Wei<sup>4</sup>, Shuang-neng Wang<sup>1</sup>,  
Shaoliang Du<sup>1</sup>, Xi-guang Zhang<sup>1\*</sup>

<sup>1</sup>Department of Orthopedic Surgery, The People's Hospital of Yuxi City, The 6th Affiliated Hospital of Kunming Medical University, 21 Nieer Road, Yuxi 653100, Yunan, China.

<sup>2</sup>Department of Nephrology, The People's Hospital of Yuxi City, The 6th Affiliated Hospital of Kunming Medical University, 21 Nieer Road, Yuxi 653100, Yunan, China.

<sup>3</sup>Department of Orthopedics of the Affiliated Hospital of Hebei University of Engineering, China.

<sup>4</sup>Department of Orthopedics of the Second Affiliated Hospital of Harbin Medical University, China.

\*Corresponding authors

Email: [tengzhaowei2003@163.com](mailto:tengzhaowei2003@163.com) (TZW) or [gwkzxcg@163.com](mailto:gwkzxcg@163.com) (ZXG)

¶Zhaowei Teng and Yun Zhu are co-first authors.

**Supplementary Table S1: Infection outcome definition of the 8 RCTs included in the final analysis.**

---

| <b>Study, year</b>   | <b>Definition</b>                                                                                                                                                                                                                                                                                                                                                                                                                                                                                                                       |
|----------------------|-----------------------------------------------------------------------------------------------------------------------------------------------------------------------------------------------------------------------------------------------------------------------------------------------------------------------------------------------------------------------------------------------------------------------------------------------------------------------------------------------------------------------------------------|
| Carson, 1998         | Used a modified Centers for Disease Control and Prevention (CDC) case definition of pneumonia: chest radiograph with new or progressive infiltrate, consolidation, or cavitation and any of the following: new onset of purulent sputum or change in character of sputum or the isolation of the organism from blood culture, transtracheal aspirate, bronchial brushings, or biopsy. Did not consider a patient with rales and purulent sputum to have pneumonia, and did not use pleural effusion in the chest radiograph definition. |
| Grover, 2006         | New infections requiring antibiotic therapy                                                                                                                                                                                                                                                                                                                                                                                                                                                                                             |
| Foss, 2009           | Any infectious complication such as pneumonia, sepsis and wound infection                                                                                                                                                                                                                                                                                                                                                                                                                                                               |
| So-Osman, 2009       | The CDC criteria according to Horan's study (Horan TC, Gaynes RP, Martone WJ, Jarvis WR, Grace Emori T (1992) CDC definitions of nosocomial surgical site infections, 1992: A modification of CDC definitions of surgical wound infections. American Journal of Infection Control 20: 271-274.)                                                                                                                                                                                                                                         |
| Carson, 2011         | Wound infection; new onset purulent sputum; chest radiograph with new or progressive infiltrate                                                                                                                                                                                                                                                                                                                                                                                                                                         |
| Parker, 2013         | Any infectious complication such as pneumonia, superficial wound infection, deep wound infection and septicemia with septic shock                                                                                                                                                                                                                                                                                                                                                                                                       |
| Gruber-Baldini, 2013 | Any infections                                                                                                                                                                                                                                                                                                                                                                                                                                                                                                                          |
| Fan, 2014            | Any infectious complication such as pneumonia, superficial wound infection and urinary tract infection                                                                                                                                                                                                                                                                                                                                                                                                                                  |

---

**Supplementary Table S2:** Methodological quality of studies included in the final analysis, based on the Jadad scale.

| RCTs           | Randomization 2                       |                                                                  |                                                                            | Blinding 2                       |                                                             |                                                                       | An account of all patients 1                                                               | Total score |
|----------------|---------------------------------------|------------------------------------------------------------------|----------------------------------------------------------------------------|----------------------------------|-------------------------------------------------------------|-----------------------------------------------------------------------|--------------------------------------------------------------------------------------------|-------------|
|                | 1 point if randomization is mentioned | 1 additional point if the method of randomization is appropriate | Deduct 1 point if the method of randomization is inappropriate (minimum 0) | 1 point if blinding is mentioned | 1 additional point if the method of blinding is appropriate | Deduct 1 point if the method of blinding is inappropriate (minimum 0) | The fate of all patients in the trial is known. If there are no data, the reason is stated |             |
| Carson, 1998   | 1                                     | 0                                                                | 0                                                                          | 1                                | 0                                                           | 0                                                                     | 1                                                                                          | 3           |
| Grover, 2006   | 1                                     | 0                                                                | 0                                                                          | 1                                | 0                                                           | 0                                                                     | 1                                                                                          | 3           |
| Foss, 2009     | 1                                     | 1                                                                | 0                                                                          | 1                                | 1                                                           | 0                                                                     | 1                                                                                          | 5           |
| So-Osman, 2009 | 1                                     | 0                                                                | 0                                                                          | 1                                | 1                                                           | 0                                                                     | 1                                                                                          | 4           |
| Carson, 2011   | 1                                     | 1                                                                | 0                                                                          | 1                                | 1                                                           | 0                                                                     | 1                                                                                          | 5           |

|                     |   |   |   |   |   |   |   |   |
|---------------------|---|---|---|---|---|---|---|---|
| Parker, 2013        | 1 | 1 | 0 | 1 | 1 | 0 | 1 | 5 |
| Gruber-Baldini,2013 | 1 | 1 | 0 | 1 | 0 | 0 | 1 | 4 |
| Fan, 2014           | 1 | 1 | 0 | 1 | 1 | 0 | 1 | 5 |

---

**Supplementary Table S3:** RBC transfused and baseline hemoglobin in the 8 RCTs.

| Study, year    | RBC transfused (R)                                                                                 | RBC transfused (L)                                                                         | Baseline hemoglobin(R)    | Baseline hemoglobin(L)    |
|----------------|----------------------------------------------------------------------------------------------------|--------------------------------------------------------------------------------------------|---------------------------|---------------------------|
| Carson, 1998   | 0 (Median) (IQR 0-2) units;<br>19 (45.2%) patients received RBC<br>transfusion                     | 2 (median) (IQR 1-2);<br>41 (97.6%) patients received RBC<br>transfusion                   | (9.1±0.6) g/dL            | (9.1±0.6) g/dl            |
| Grover, 2006   | 0 (Median) (Range 0-5) units; 37<br>(34%) patients were transfused a total<br>of 89 red cell units | 0 (Median) (Range 0-10) units; 46<br>(43%) patients received a total of<br>119 units       | (13.1±1.22) g/dL          | (13.6±1.22) g/dL          |
| Foss, 2009     | 1 (Median) (IQR 1-2) units;<br>22 (37%) patients received<br>transfusions                          | 2 (Median) (IQR 1-2) units; 44<br>(74%) patients received<br>transfusions                  | Not available but graphed | Not available but graphed |
| So-Osman, 2009 | 0.78 (Mean) ±(SD1.4);<br>105 (35%) patients<br>received RBC transfusion                            | 0.86 (Mean) ±(SD 1.6)<br>93 (31%) patients<br>received RBC transfusion                     | (13.7±1.4) g/dL           | (13.7±1.4) g/dL           |
| Carson, 2011   | 0 (Median) (IQR 0-1) units;<br>413 (41%) patients were transfused a<br>total of 652 units          | 2 (Median) (IQR 1-2) units; 970<br>(97%) patients were transfused a<br>total of 1866 units | (11.3±1.5) g/dL           | (11.3±1.5) g/dL           |

|                     |                                                                           |                                                                                  |                 |                 |
|---------------------|---------------------------------------------------------------------------|----------------------------------------------------------------------------------|-----------------|-----------------|
| Parker, 2013        | No patient received a blood transfusion                                   | All patients received a blood transfusion, with a mean of 1.9 units              | 11.8 g/dL       | 11.5 g/dL       |
| Gruber-Baldini,2013 | 0 (Median) units; 33 (45.8%) patients were transfused a total of 53 units | 2 (Median) units; 63 (95.4%) patients were transfused a total of 115 units       | (11.9±1.7) g/dL | (11.9±1.3) g/dL |
| Fan, 2014           | 41(43.6%) patients received a blood transfusion                           | 52 (56.5%) patients received a blood transfusion. More units transfused (p=0.03) | (12.0±1.1) g/dL | (11.8±1.2) g/dL |

---

Note: R represents restrictive blood transfusion strategies; L represents liberal blood transfusion strategies.

**Supplementary Table S4:** Search strategy for meta-analysis designed by Rohde.

|                                                                                                                                                                    |
|--------------------------------------------------------------------------------------------------------------------------------------------------------------------|
| 1. *Blood Transfusion/                                                                                                                                             |
| 2. ((Red blood cell* or RBC) adj3 (therap* or transfus*)).mp.                                                                                                      |
| 3. 1 or 2                                                                                                                                                          |
| 4. exp Reference Standards/                                                                                                                                        |
| 5. standards.fs.                                                                                                                                                   |
| 6. methods.fs.                                                                                                                                                     |
| 7. 4 or 5 or 6                                                                                                                                                     |
| 8. 3 and 7                                                                                                                                                         |
| 9. ((H?emoglobin or h?emocrit or HB or HCT) adj5 (polic*or practic* or protocol* or trigger* or threshold*or indicator* or strateg* or criteri* or standard*)).mp. |
| 10. (transfus* adj5 (polic*or practic* or protocol* or trigger* or threshold*or indicator* or strateg* or criteri* or standard*)).mp.                              |
| 11. ((Red blood cell* or RBC) adj5 (polic*or practic* or protocol* or trigger* or threshold*or indicator* or strateg* or criteri* or standard*)).mp.               |
| 12. (transfus* adj5 (restrict* or liberal*)).mp.                                                                                                                   |
| 13. ((blood or transfus*) adj3 (management or program*)).mp.                                                                                                       |

|                                                                                      |
|--------------------------------------------------------------------------------------|
| 14. 8 or 9 or 10 or 11 or 12 or 13                                                   |
| 15. randomi?ed.ab,ti.                                                                |
| 16. randomized controlled trial.pt.                                                  |
| 17. controlled clinical trial.pt.                                                    |
| 18. placebo.ab.                                                                      |
| 19. clinical trials as topic.sh.                                                     |
| 20. randomly.ab.                                                                     |
| 21. trial.ti.                                                                        |
| 22. 15 or 16 or 17 or 18 or 19 or 20 or 21<br>(animals not (humans and animals)).sh. |
| 23. (animals not (humans and animals)).sh.                                           |
| 24. 22 not 23                                                                        |
| 25. 14 and 24                                                                        |
| 26. (hip or knee or orthopedic or fracture).ab,ti.                                   |



27. 25 and 26

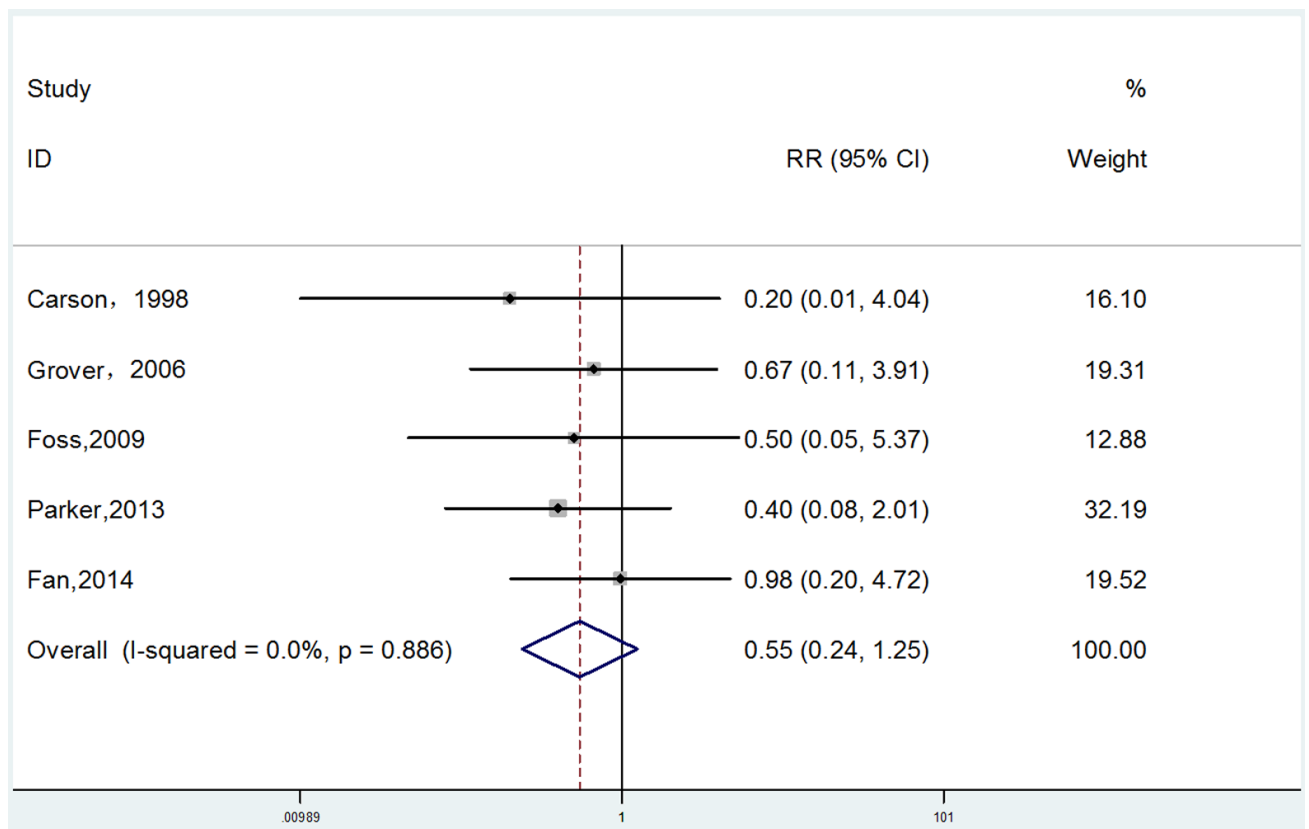

**Supplementary Figure S1:** Forest plot for pneumonia risk according to 5 RCTs in a fixed-effects model meta-analysis.

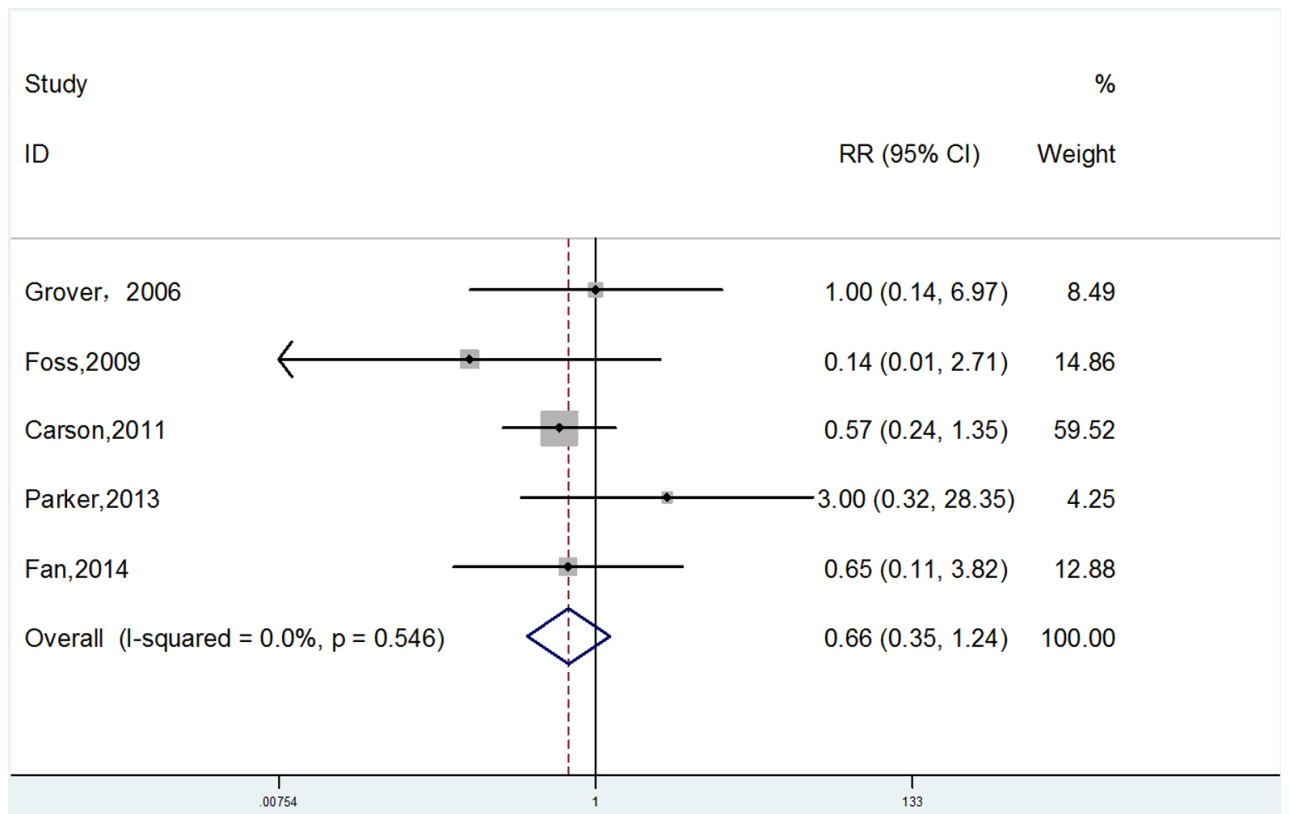

**Supplementary Figure S2:** Forest plot for wound infection risk according to 5 RCTs in a fixed-effects model meta-analysis.

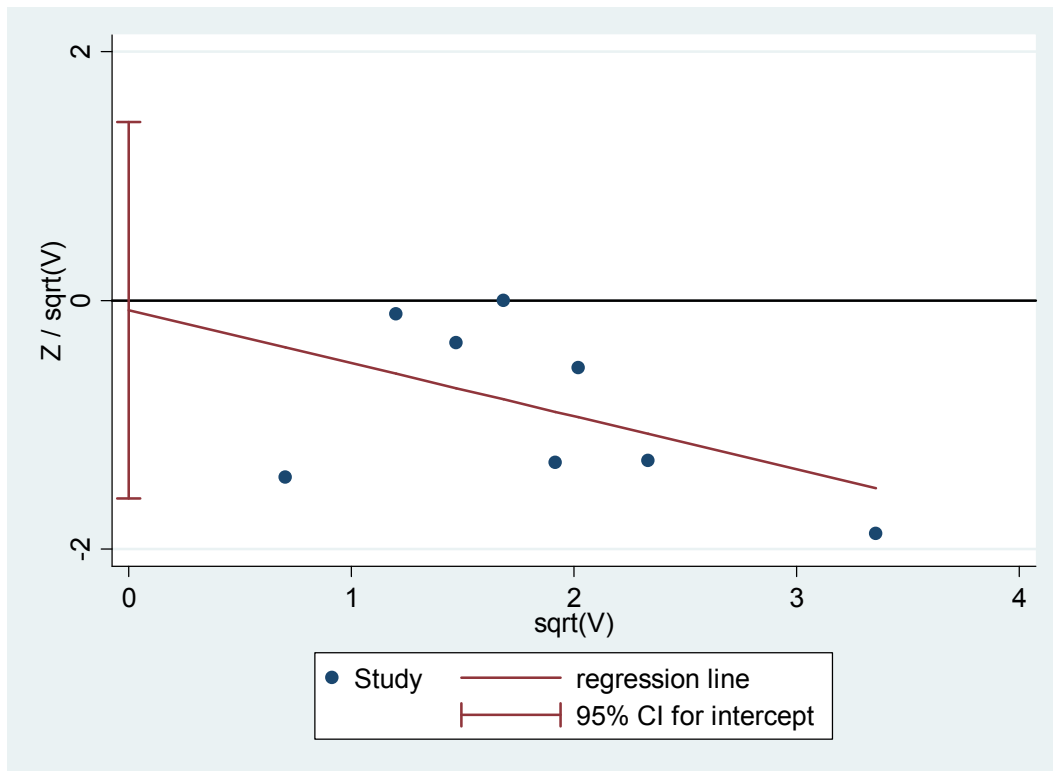

**Supplementary Figure S3:** Harbord publication bias plot of the 8 RCTs.

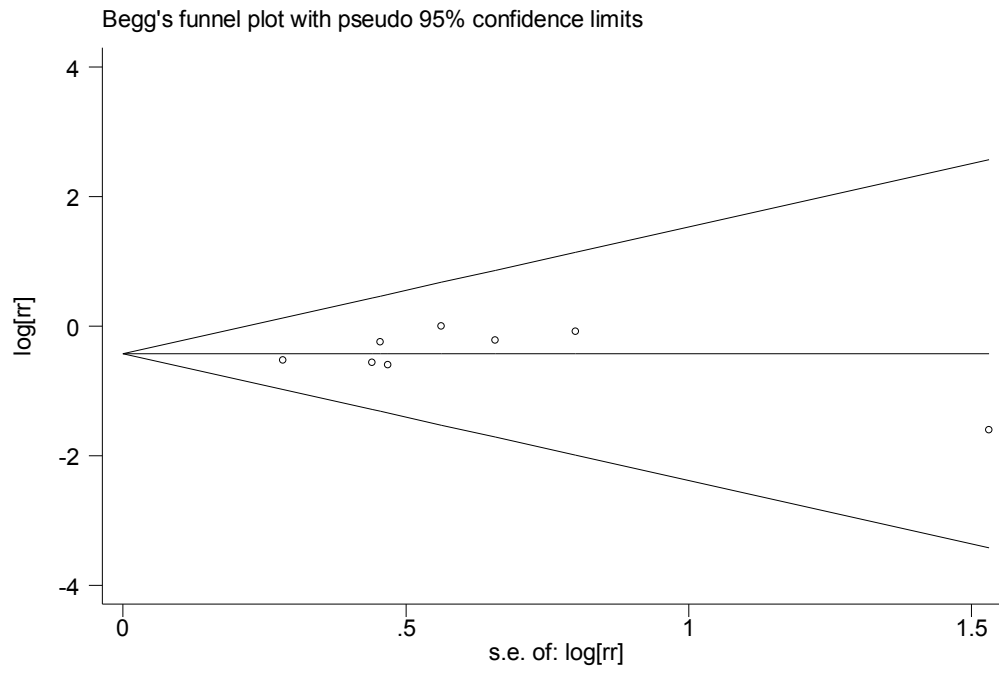

**Supplementary Figure S4:** Begg's funnel plot of the 8 RCTs.

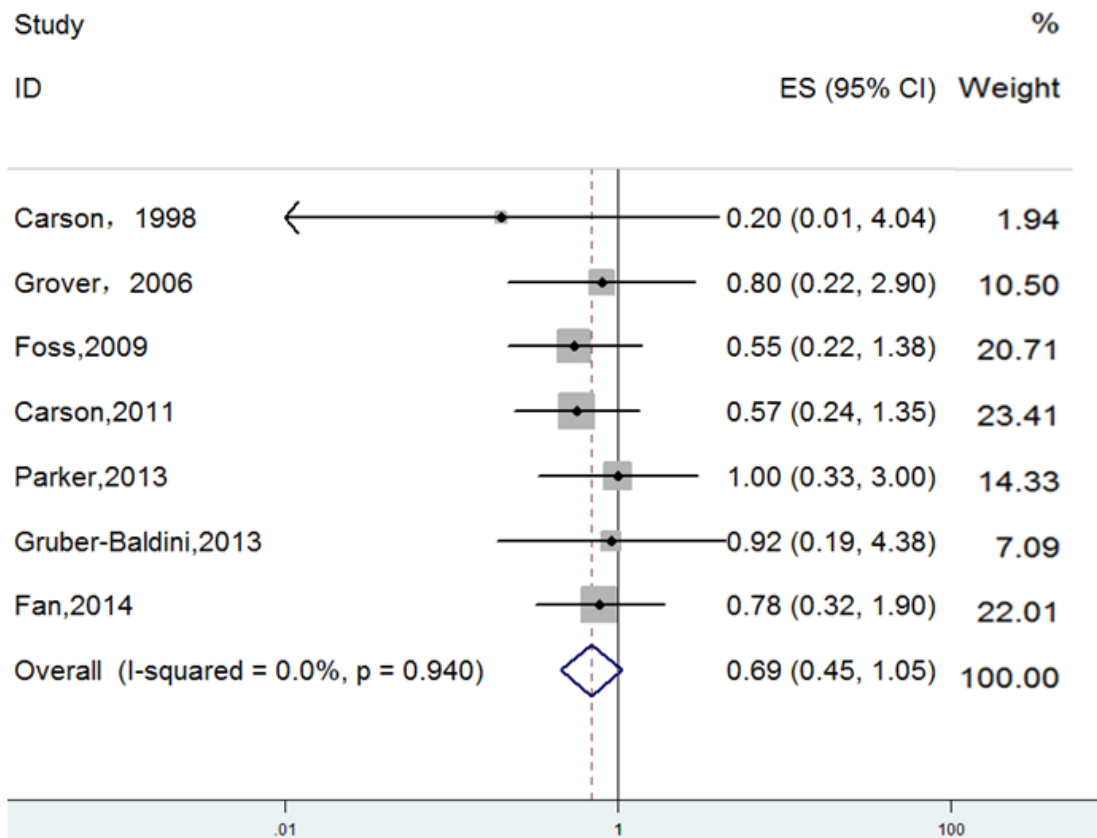

**Supplementary Figure S5:** Forest plot for RCTs after omitting So-Osman’s trial in a fixed-effects model meta-analysis.
